# Supplementary material for: Gene Families With Stochastic Exclusive Gene Choice Underlie Cell Adhesion in Mammalian Cells
Source: PubMed Central journal article supplement (PMC8117012; doi:10.3389/fcell.2021.642212), 2021-04-29
Supplement: Data_Sheet_1.pdf [file Data_Sheet_1.pdf]

## Supplementary Material

Supplementary Text 1

Supplementary Figures 1 to 6

Supplementary Tables 1 to 4

Supplementary Data 1 to 2

### Supplementary Text 1. Comparison of the dichotomization methods.

The overview describes the design of the dichotomization and related data processing described in Supplementary Table 2. The detailed procedures and formulas are described in the Materials and Methods. At the end, we compare the dichotomization of genes in families using the fGTME and the constant 0.5-threshold.

We use the following nomenclature for the terms related to stochastic gene choice. Gene expression in single cells as measured by RNA-seq is a discrete or continuous variable, which is dichotomized to obtain ON and OFF expression states. Thus, stochastic gene choice refers to genes with ON and OFF expression states. The IC is calculated from the dichotomized data (0, 1). Stochastic gene choice can be exclusive, independent or concurrent according to the value of the IC.

#### Screening for bimodality with the bimodality index (BI)

For the analysis of chromosomal segments, a restriction ( $BI > 0.55$ ) was imposed only to the datasets with TPM units but not with the UMI units. This difference originates from the fact that fitting of the UMI distributions resulted only rarely in mixture distributions, which have the potential to have a minimum between the two peaks.

For the analysis of the gene families, the bimodality index was not applied at all since the information of all families is combined and thus, even unimodal distributions can be assigned to the ON or OFF states correctly with high certainty.

#### Minimal threshold (0.5)

For FPKM/ TPM units, 0.5 is commonly considered as a cutoff, and the following specifications are used for the expression levels: cutoff (0.5), low (0.5 to 10), medium (11 to 1000), high (1000 and more) [<https://www.ebi.ac.uk/gxa/FAQ.html>].

For each type of analysis and dataset, a specific method was used to determine the threshold (Supplementary Table 2). Whenever the calculated threshold was below 0.5 it was replaced by 0.5. Thus, the minimum threshold for all methods was set to 0.5. This minimum threshold filters out spurious peaks.

For example, the dichotomization of the somatosensory neuron dataset resulted in 6673 0.5 thresholds out of the 20854 measured genes. Thus, 32% of the thresholds is at 0.5 TPM.

In the datasets with UMI units, all data less than one are zeros. Thus, a 0.5 value is symbolically chosen, as an arbitrary value below one.

## **Selection of thresholds and their validation**

For the chromosomal segments, as described in the main text, the antimode of the probability mass/density function was used to validate the thresholds for the TPM datasets whereas the accuracy of the dichotomization of the marker genes was used to validate thresholds for the UMI datasets.

To design the dichotomization for the gene families, we adapted the thresholds definitions for the segments to the families with the respective units (Supplementary Table 2).

For the chromosome segments calculated with TPM data sets, the constant threshold value of 0.5 correlates almost as well with the antimode dichotomization as the GTME (Figure 1). Analyzing the UMI records with the constant threshold results in less accuracy than FM and GTME, but higher accuracy than VRS. (Supplementary Figure 3). Thus, GTME and FM are among the two best methods for analyzing TPM and UMI datasets.

## **Minimal number of genes in a segment to calculate IC**

To ensure sufficient diversity in the expressed genes, each segment or family had to contain a minimal number of genes.

### *1. Chromosomal segments*

Each chromosomal segment had to contain a minimum number of genes that were measured in a particular dataset and that were bimodal (TPM).

This minimum number was 6, 12 and 18 for the segments encompassing 7, 14 and 21 genes, respectively.

### *2. Gene families*

Each family had to contain at least five genes for the calculation of the IC. The gene families were then ranked according to the IC values. Gene families belonging to the bottom 2.5 percentile of the IC distribution were then processed by the overlap analysis. In the overlap analysis, additional criteria were introduced to identify gene families with exclusive gene choice in multiple cell types. The number of genes with larger than zero ON cell frequencies had to be 5 or 6 depending on whether the IC was significantly below one or only numerically.

## **Validation of the fGTME on classic exclusive gene families and comparison to the constant threshold value of 0.5**

The dichotomization by the fGTME plays a central role in our study since it is used to identify gene families with exclusive gene expression given the fact that the majority of datasets have or were converted to TPM units.

Therefore, the fGTME was additionally validated by comparing to the classic exclusive families expressing a single gene (Tcrbv, olfactory receptor). Here, we compare the dichotomization with a constant threshold value of 0.5 for all gene families.

The fGTME correctly identifies strong exclusivity in both families as well as the mean number of expressed genes, is in line with previous expectation (Supplementary Table 3). On the other

hand, the constant 0.5 threshold yields inconsistent results. For example, olfactory neurons results in a large IC indicating concurrence ( $IC = 3.33$ ) instead of the marked exclusivity (0.48). Furthermore, the mean number of expressed genes increases from one to two. For the T-cell receptor family *Trbv*, both the constant 0.5 and the family-wise thresholds yield exclusive gene expression. However, the mean number of expressed genes is considerably larger with the constant threshold (around 2 versus 1.3). The latter number is more realistic since 3 to 10% of T-cells have biallelic *Tcrbv* recombination (2), which would result in a mean number of expressed isoforms of around 1.1 (*Tcrbv* isoforms per cell at the RNA level). Furthermore, if the 0.5 threshold is applied, the *Pcdh*  $\alpha$ -array will be not exclusive in any of the cell types (Supplementary Data 1). These examples show that familywise thresholds are superior to the constant thresholds in the detection of gene families with exclusive gene choice.

## REFERENCES

1. Baran-Gale J, Chandra T, Kirschner K. Experimental design for single-cell RNA sequencing. *Brief Funct Genomics*. 2018;17(4):233-9.
2. Brady BL, Steinel NC, Bassing CH. Antigen receptor allelic exclusion: an update and reappraisal. *J Immunol*. 2010;185(7):3801-8.

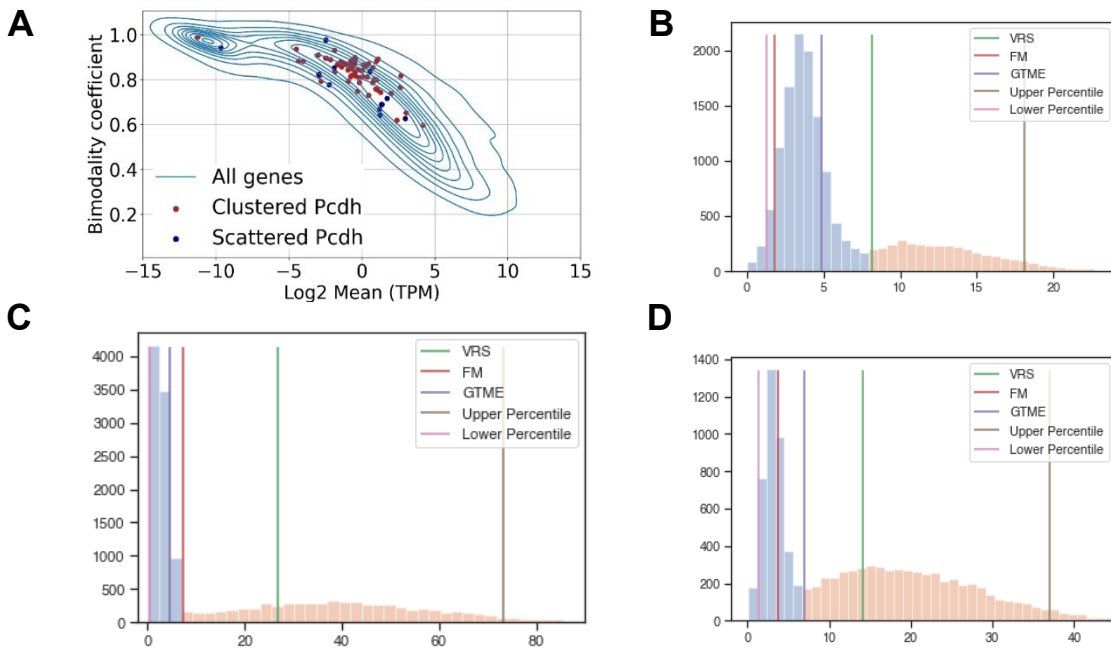

**Supplementary Figure 1. Bimodality and thresholds to dichotomize the distributions.** (A) The bimodality index ( $b$ ) calculated for the genes the somatosensory neuron dataset. All genes are shown as isobaric density plots, whereas the Pcdh genes are also indicated in form of scatter. There is an anticorrelation between the mean TPM and  $b$ ; the Spearman rank correlation coefficient (all genes) is -0.88. (B-D) Simulated bimodal distributions representing mixtures of two normal distributions  $N(\text{mean}, \text{standard deviation})$ . The blue and orange parts denote the distributions left and right to the antimode, respectively. Varying the parameters of the distributions, the best threshold is obtained by different dichotomization methods. (B)  $N(3.5, 1.2)$  and  $N(11, 5)$  with a 2:1 proportion. (C)  $N(2, 2)$  and  $N(38, 22)$ ; 10:7. (D)  $N(3, 1)$  and  $N(17, 11)$ ; 3:7.

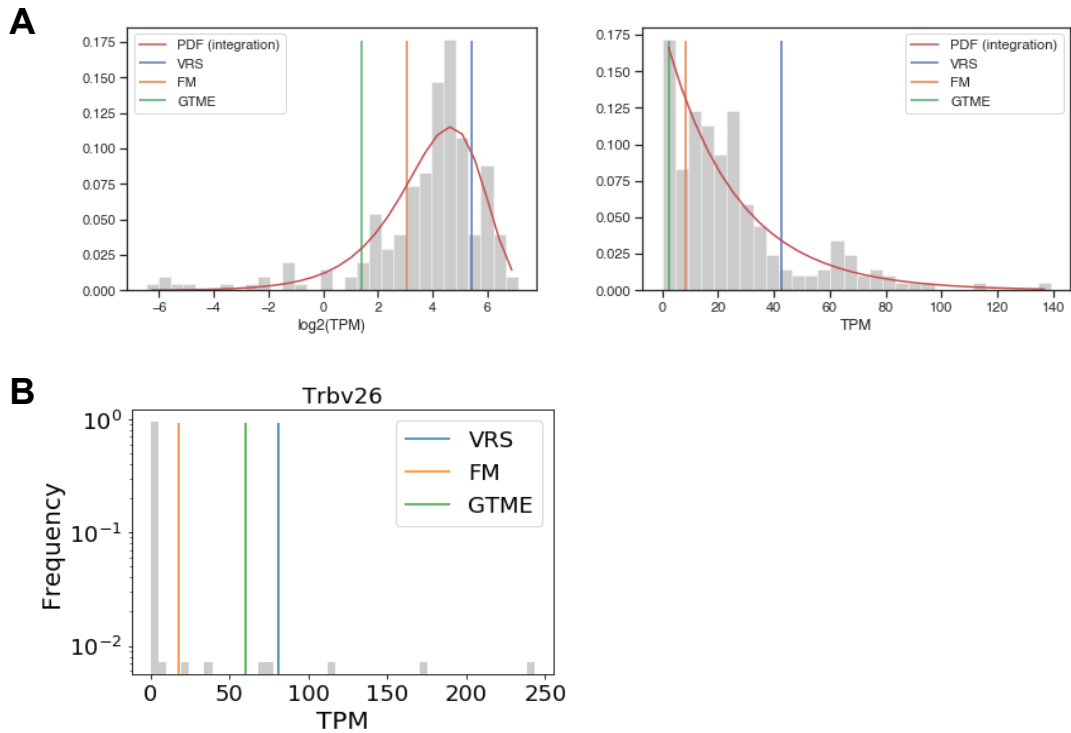

**Supplementary Figure 2.** RNA counts fitted with distributions without antimodes. **(A)** The Piezo2 gene is expressed in all cells of the cell population. An exponential function is fitted with  $\lambda = 0.039$ . The thresholds yield the following ON cell frequencies: 0.17 (VRS), 0.76 (FM) and 0.90 (GTME) TPM. The plot on the right side is the version of the main plot with a linearly scaled x-axis. **(B)** The expression of Trbv26 in Th17 cells. BI = 0.88. The majority of cells do not express this gene and a Poisson distribution with a mean value close to zero is fitted (not shown).

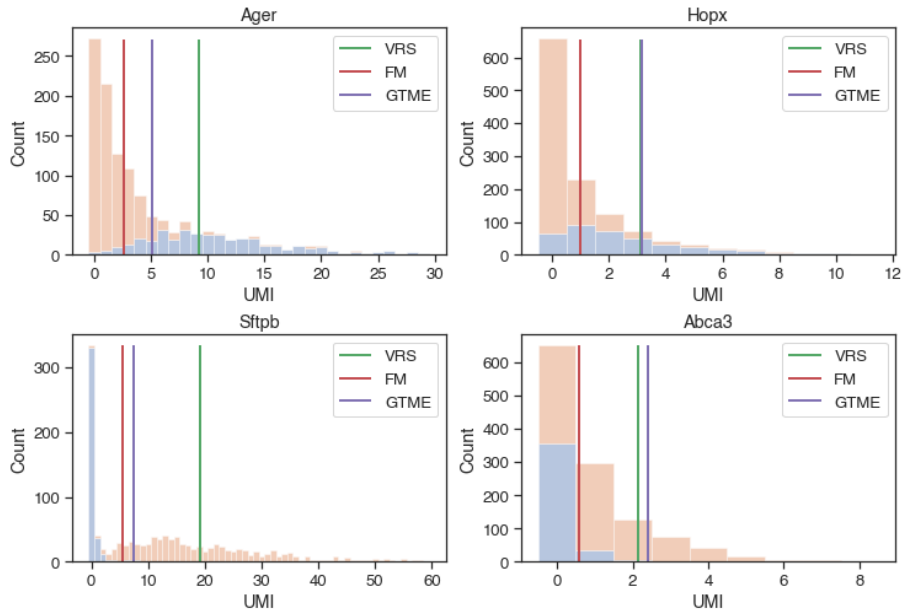

|                      | VRS         | FM          | GTME        | 0.5         |
|----------------------|-------------|-------------|-------------|-------------|
| Ager                 | 0.84        | 0.80        | 0.90        | 0.54        |
| Hopx                 | 0.75        | 0.75        | 0.75        | 0.75        |
| Sftpb                | 0.61        | 0.93        | 0.90        | 0.94        |
| Abca3                | 0.44        | 0.72        | 0.44        | 0.72        |
| <b>Mean Accuracy</b> | <b>0.66</b> | <b>0.80</b> | <b>0.75</b> | <b>0.74</b> |

**Supplementary Figure 3.** The histograms show the expression of four marker genes in Type I (blue) and Type II (orange) alveolar cells. 0.5 denotes a constant threshold at 0.5 UMI, which separates zero from non-zero counts. The Table below contains the accuracies. FM is associated with the lowest misclassification of the two cell types, as evidenced from the highest mean accuracy yielded by this method.

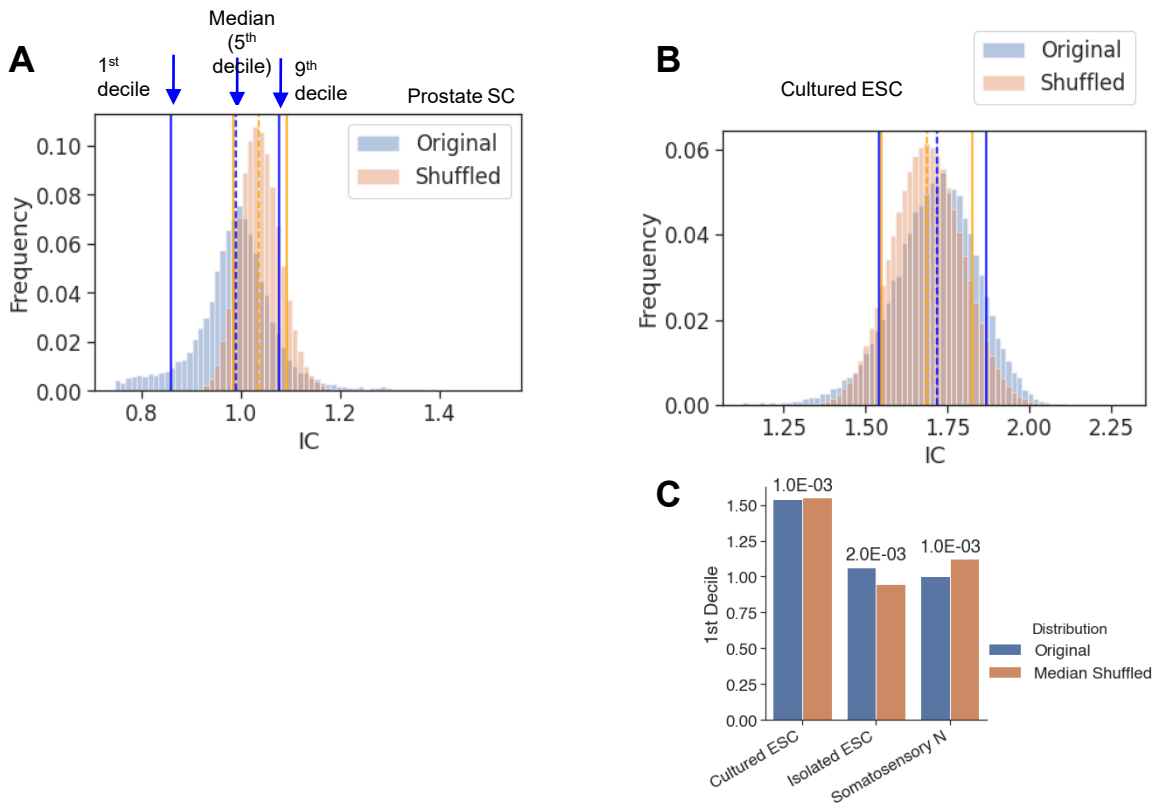

**Supplementary Figure 4.** Effect of the chromosomal proximity on the stochastic interdependence analyzed by the permutation test. **(A, B)** The location of the 1<sup>st</sup> (full line), 5<sup>th</sup> (dashed line) and 9<sup>th</sup> (full line) deciles is given in the order of original and reshuffled distribution, followed by the P-values for the differences: 0.85, 0.99 and 1.08; 0.99, 1.04 and 1.09; 0.001, 0.001 and 0.001 (A) 1.54, 1.72 and 1.87; 1.55, 1.69 and 1.83; 0.001, 0.001 and 0.001 (B). **(C)** The 1<sup>st</sup> decile IC values are shown for the original and the shuffled genomes, along with the P-values (permutation test) for the differences in the three cell types.

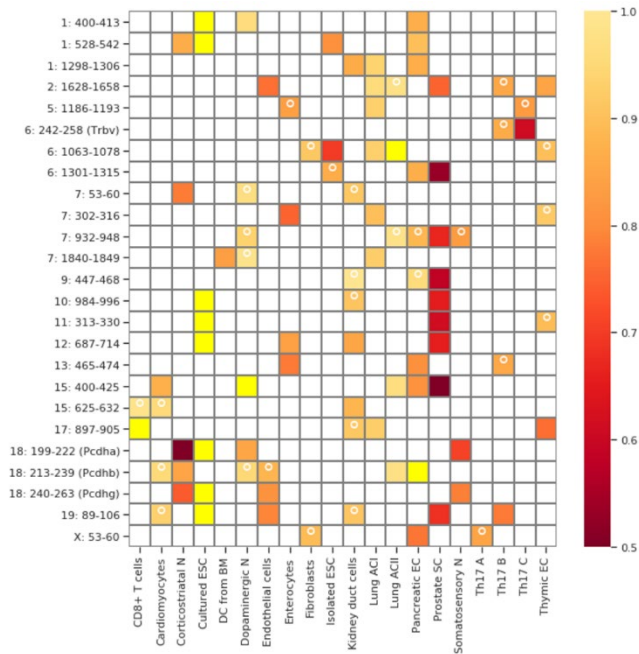

**Supplementary Figure 5.** Chromosomal segments with IC values in the bottom 2.5 percentile of the IC distributions in more than two cell types. The segments contain 7, 14 or 21 genes. Segments having an IC value significantly less than one at least in one cell type are shown provided they express at least 0.03 genes per cell on average and at least 5 gene isoforms in the population of a particular cell type. The white circle denotes segments with an IC numerically less than 1 without reaching significance. In this case, 6 gene isoforms had to be expressed in a cell type. The yellow squares denote IC values greater than one which still belong to the bottom 2.5 percentile. The Tcrbv family is not shown in the Th17A cells because only 11 genes in the 14-gene segment were measured and dichotomized.



**A**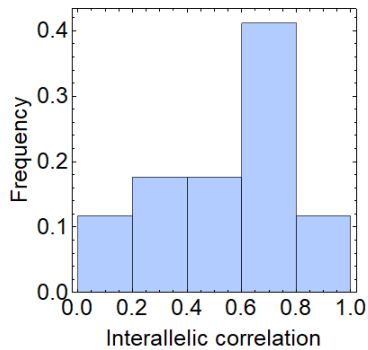**B**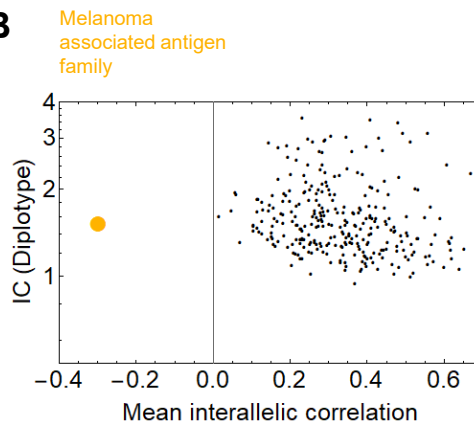

**Supplementary Figure 6.** The relation between allelic exclusion and the interdependence coefficient. **(A)** Interallelic correlation in the Pcdh genes expressed in fibroblasts. The beta and gamma isoforms are expressed. **(B)** The relation between interallelic correlation and IC for gene families. The Spearman rank correlation between these two variables is -0.23 ( $P=0.000086$ ).

**Supplementary Table 1.** Description of RNA-seq data

| <b>Cell type</b>                                  | <b>Number of cells</b> | <b>Sequencing platform (mRNA count format, seq. library)</b> | <b>Mouse line [Age]</b>                                                            | <b>Author (Accession number)</b>   |
|---------------------------------------------------|------------------------|--------------------------------------------------------------|------------------------------------------------------------------------------------|------------------------------------|
| Somatosensory neurons (N) from DRG                | 204                    | Illumina HiSeq 2500 (FPKM, SMARTer Ultra Low)                | C57BL/6 [8-10 weeks]                                                               | <i>Li et al.</i> (GSE63576)        |
| Corticostriatal neurons (N)                       | 190                    | Illumina HiSeq 2500 (TPM, SMARTer Ultra Low)                 | C57BL/6J [P56±3]                                                                   | <i>Tasic et al.</i> (GSE71585)     |
| Dopaminergic neurons (N)                          | 473                    | Illumina HiSeq 2500 (FPKM, Smart-Seq2)                       | Th:EGFP BAC transgenic mice (Tg(Th-EGFP)DJ76Gsat/Mmnc) [E15.5 and P7] <sup>1</sup> | <i>Hook et al.</i> (GSE108020)     |
| Bone Marrow (BM) dendritic cells (DC) progenitors | 251                    | Illumina HiSeq 2000 (RPKM, C1 Fluidigm)                      | C57BL/6 [7-10 weeks]                                                               | <i>Schlitzer et al.</i> (GSE60781) |
| Cardiomyocytes                                    | 482                    | Illumina HiSeq 2500 (RPKM, Smart-seq2)                       | C57BL/6 [8 weeks]                                                                  | <i>Nomura et al.</i> (GSE95140)    |
| CD8+ T cells                                      | 287 <sup>2</sup>       | Illumina HiSeq 2500 (TPM, SMARTer)                           | C57BL/6J                                                                           | <i>Kakaradov et al.</i> (GSE89405) |
| Cultured ES cells (ESC)                           | 935                    | Illumina HiSeq 2500 (UMI, CEL-SEQ)                           | IB10 (derived from 129/Ola strain)                                                 | <i>Klein et al.</i> (GSE65525)     |
| Embryo-isolated ES cells (ESC)                    | 1724                   | Illumina HiSeq 2000 (RPKM, Smart-Seq2)                       | Different mouse lines. [E5.25, E5.5, E6.25 and E6.5] <sup>3</sup>                  | <i>Cheng et al.</i> (GSE109071)    |
| Endothelial cells <sup>4</sup>                    | 111                    | Illumina HiSeq 3000 (FPKM, SMARTer Ultra Low)                | C57BL/6J [6-10 weeks]                                                              | <i>Veerman et al.</i> (GSE106514)  |
| Enterocytes from intestinal epithelium            | 155 <sup>5</sup>       | Illumina NextSeq 500 (TPM, SMART-Seq2)                       | C57BL/6 [7-10 weeks]                                                               | <i>Haber et al.</i> (GSE92332)     |

|                                                    |                                          |                                                |                                                                             |                                     |
|----------------------------------------------------|------------------------------------------|------------------------------------------------|-----------------------------------------------------------------------------|-------------------------------------|
| Fibroblast                                         | 354 <sup>6</sup>                         | Illumina HiSeq 2000 (RPKM, Smart-seq2)         | CAST/EiJxC57BL/6J or C57BL/6JxC57BL/6J                                      | <i>Reinius et al.</i> (GSE75659)    |
| Kidney duct cells (DC)                             | 235 <sup>7</sup>                         | Illumina HiSeq 3000 (TPM, SMART-seq)           | C57BL/6 [2 months]                                                          | <i>Chen et al.</i> (GSE99701)       |
| Liver Hepatoblasts / hepatocytes (HB/HC)           | 353                                      | Illumina HiSeq 2000 and 2500 (TPM, Smart-Seq2) | F1 progenies of C57BL/6 and C3H (B6C3F1) mice [E10.5 to E17.5] <sup>8</sup> | <i>Yang et al.</i> (GSE90047)       |
| Lung alveolar cells (types I and II) (ACI, ACII)   | 1222 (395 AT1, 827 AT2)                  | Illumina HiSeq 2500 (UMI, Drop-seq)            | C57BL/6J [P1]                                                               | <i>Guo et al.</i> (GSE122329)       |
| Mature thymic epithelial cells (EC)                | 174                                      | Illumina HiSeq 2500 (FPKM, SMART-seq)          | C57BL/6 [4 weeks]                                                           | <i>Sansom et al.</i> (GSE60297)     |
| Pancreatic endocrine cells (EC)                    | 438                                      | Illumina HiSeq 4000 and 2500 (TPM, Smart-Seq2) | C57BL/6 [E10.5 to E12.5]                                                    | <i>Yu et al.</i> (GSE115931)        |
| Prostate stromal cells (SC)                        | 1417                                     | Illumina HiSeq 2500 (FPKM, iCELL8)             | C57BL/6 [8-10 weeks]                                                        | <i>Craighton et al.</i> (GSE119988) |
| Th17 cells (Th17 A., Th17 B., Th17 C) <sup>9</sup> | 139 (Th17 A), 130 (Th17 B), 151 (Th17 C) | Illumina Genome Analyzer II (FPKM, SMART-Seq)  | C57BL/6                                                                     | <i>Gaublomme et al.</i> (GSE74833)  |

<sup>1</sup> Th-eGFP+ dopaminergic neurons collected at two timepoints from three brain regions (midbrain, forebrain, olfactory bulb).

<sup>2</sup> One cell from this dataset was excluded from the analysis since it showed no expression for the whole gene set.

<sup>3</sup> There are three types of mice crossing: 1) C57BL/6J (C57) female mice mated to C57 male mice; 2) CAST/EiJ (CAST) female mice mated to C57 male mice; 3) C57 female mice mated to CAST male mice.

<sup>4</sup> The analysed data comprise blood endothelial cells and high endothelial cells.

<sup>5</sup> Different cell types have been analysed in the original paper, included enterocytes, enterocytes progenitors, enteroendocrine cells, goblet cells, paneth cells, TA cells and Tuft cells; for this work, only enterocytes have been considered.

<sup>6</sup> Split-cell lysates and pooled cells have not been considered.

<sup>7</sup>Different cell types have been analysed, included Proximal tubule cell, intercalated cells and principal cells.

<sup>8</sup>The whole set of cells of this study is composed of 447 hepatoblasts/hepatocytes and 82 cholangiocyte. Some of these cells have been treated with molecules to accelerate the differentiation process. We selected the untreated cells identified as hepatoblasts/hepatocytes (353 cells).

<sup>9</sup> Three different growth protocols; IL1B\_IL6\_IL23-48h-IL-17A/GFP+, TGFB1\_IL6-48h and TGFB1\_IL6-48h-IL-17A/GFP+ (139, 130 and 151 single cells).

**Supplementary Table 2.** Steps of data processing for the dichotomization to analyze chromosomal segments and gene families.

| Type of Analysis                                                                         | Chromosomal segments                                                                       |                                                 | Gene families                                                                                                                                                                                                                                     |                                                                |
|------------------------------------------------------------------------------------------|--------------------------------------------------------------------------------------------|-------------------------------------------------|---------------------------------------------------------------------------------------------------------------------------------------------------------------------------------------------------------------------------------------------------|----------------------------------------------------------------|
|                                                                                          | FPKM or TPM                                                                                | UMI                                             | FPKM or TPM                                                                                                                                                                                                                                       | UMI                                                            |
| Data conversion                                                                          | FPKM→TPM                                                                                   | None                                            | FPKM→TPM                                                                                                                                                                                                                                          | None                                                           |
| Screening for bimodality with bimodality index                                           | genes with B.I. > 0.55                                                                     | No                                              | No                                                                                                                                                                                                                                                | No                                                             |
| Threshold type                                                                           | GTME                                                                                       | FM                                              | Family-wise GTME (fGTME)                                                                                                                                                                                                                          | Family-wise FM (fFM)                                           |
| Minimal threshold                                                                        | 0.5                                                                                        | 0.5                                             | 0.5                                                                                                                                                                                                                                               | 0.5                                                            |
| Selection of thresholds                                                                  | Correlation to antimode of the fitted probability density function                         | Accuracy of the dichotomization of marker genes | Adaptation of the threshold for segments (GTME) to the families.                                                                                                                                                                                  | Adaptation of the threshold for the segments (FM) to families. |
| Minimal number of measured and dichotomized genes in a segment / family to calculate IC. | 6 genes in a 7-gene segment, 12 genes in a 14-gene segment, 18 genes in a 21-gene segment. |                                                 | Number of genes with positive ON cell frequencies: 5 genes when the IC is significantly below 1 6 genes when the IC is numerically below 1 (These conditions were applied to detect families with exclusive expression with the overlap analysis) |                                                                |
| Minimal mean number of ON genes (gene isoforms) per cell                                 |                                                                                            |                                                 | 0.03 for the overlap analysis to identify gene families with exclusive gene choice                                                                                                                                                                |                                                                |

**Supplementary Table 3.** The mean number of ON genes and the IC of representative families calculated with constant and geometric dichotomization.

| <b>Gene family<br/>(cell type)</b>                  | <b>Family-wise threshold<br/>(fGTME)</b> |                                            |           | <b>Constant threshold (0.5)</b> |                                            |           |
|-----------------------------------------------------|------------------------------------------|--------------------------------------------|-----------|---------------------------------|--------------------------------------------|-----------|
|                                                     | <b>Threshold<br/>(TPM)</b>               | <b>Mean<br/>number<br/>of ON<br/>genes</b> | <b>IC</b> | <b>Threshold<br/>(TPM)</b>      | <b>Mean<br/>number<br/>of ON<br/>genes</b> | <b>IC</b> |
| <b>Trbv<br/>Th17A</b>                               | 86.6                                     | 1.15                                       | 0.52      | 0.5                             | 1.80                                       | 0.56      |
| <b>Trbv<br/>Th17B</b>                               | 192.2                                    | 1.34                                       | 0.62      | 0.5                             | 2.02                                       | 0.67      |
| <b>Trbv<br/>Th17C</b>                               | 83.1                                     | 1.28                                       | 0.49      | 0.5                             | 1.80                                       | 0.54      |
| <b>Olfactory<br/>rec.<br/>Olfactory<br/>neurons</b> | 70.7                                     | 1.00                                       | 0.48      | 0.5                             | 1.97                                       | 3.33      |
| <b>Histones 2A<br/>Th17A</b>                        | 35.4                                     | 5.42                                       | 5.38      | 0.5                             | 16.93                                      | 4.06      |
| <b>Histones 2A<br/>Th17B</b>                        | 34.1                                     | 8.28                                       | 5.91      | 0.5                             | 17.54                                      | 3.38      |
| <b>Histones 2A<br/>Th17C</b>                        | 37.8                                     | 5.73                                       | 4.80      | 0.5                             | 16.95                                      | 4.47      |

**Supplementary Table 4.** The total number of detected genes per cell (dgpc). A gene is considered detected if it has a TPM (or UMI) > 0. The IC is calculated based on the original distribution and the distribution truncated at the 10<sup>th</sup> percentile of the original distribution.

| Cell type                | Number of cells | Mean dgpc | dgpc 10 <sup>th</sup> Percentile | dgpc 90 <sup>th</sup> Percentile | Mean IC (original) | Mean IC (truncated) | IC Ratio (orig. / trunc) |
|--------------------------|-----------------|-----------|----------------------------------|----------------------------------|--------------------|---------------------|--------------------------|
| <b>Cardiomyocytes</b>    | 482             | 6215      | 4110                             | 7843                             | 1.16               | 1.10                | 1.06                     |
| <b>CD8+ T cells</b>      | 287             | 7076      | 5563                             | 8654                             | 1.43               | 1.42                | 1.01                     |
| <b>Corticostriatal N</b> | 190             | 8706      | 7580                             | 9727                             | 1.08               | 1.06                | 1.02                     |
| <b>Cultured ESC</b>      | 933             | 11997     | 8504                             | 15059                            | 1.66               | 1.48                | 1.11                     |
| <b>DC from BM</b>        | 251             | 3997      | 2885                             | 5296                             | 1.09               | 1.08                | 1.01                     |
| <b>Dopaminergic N</b>    | 473             | 5644      | 2949                             | 7669                             | 1.35               | 1.22                | 1.09                     |
| <b>Endothelial cells</b> | 111             | 5598      | 4521                             | 6733                             | 1.12               | 1.11                | 1.00                     |
| <b>Enterocytes</b>       | 155             | 6103      | 4959                             | 7098                             | 1.11               | 1.11                | 1.01                     |
| <b>Fibroblasts</b>       | 354             | 8374      | 7440                             | 9382                             | 1.20               | 1.16                | 1.03                     |
| <b>Isolated ESC</b>      | 1724            | 9250      | 8064                             | 10501                            | 1.17               | 1.15                | 1.02                     |
| <b>Kidney duct cells</b> | 235             | 6075      | 4264                             | 7921                             | 1.12               | 1.11                | 1.01                     |
| <b>Liver HB/HC</b>       | 353             | 8882      | 7874                             | 9702                             | 1.18               | 1.15                | 1.02                     |
| <b>Lung ACI</b>          | 395             | 1074      | 611                              | 1668                             | 1.13               | 1.13                | 1.01                     |
| <b>Lung ACII</b>         | 827             | 1349      | 687                              | 2058                             | 1.20               | 1.18                | 1.01                     |
| <b>Pancreatic EC</b>     | 438             | 8016      | 6641                             | 9495                             | 1.23               | 1.22                | 1.01                     |
| <b>Prostate SC</b>       | 1417            | 892       | 263                              | 1433                             | 1.02               | 1.01                | 1.01                     |
| <b>Somatosensory N</b>   | 204             | 10854     | 9269                             | 12640                            | 1.14               | 1.10                | 1.04                     |
| <b>Th17 A</b>            | 139             | 7800      | 6754                             | 8754                             | 1.09               | 1.08                | 1.01                     |
| <b>Th17 B</b>            | 130             | 8331      | 7319                             | 9145                             | 1.15               | 1.15                | 1.00                     |
| <b>Th17 C</b>            | 151             | 7729      | 6669                             | 8715                             | 1.09               | 1.08                | 1.01                     |
| <b>Thymic EC</b>         | 174             | 5228      | 3792                             | 6509                             | 1.17               | 1.15                | 1.01                     |
